# Supplementary material
Source: publisher figshare collection journal article supplement (https://tandf.figshare.com/ndownloader/files/14133626)
Supplement: Supplementary file 1 [file 14133626]

Table 4. Supplement. The questionnaire

| Gender | 🞏  🞏 | Male  Female |
| --- | --- | --- |
| Age |  | ……………. |
| How many years have you worked as a dentist? | 🞏  🞏  🞏  🞏 | <5 years  5–10 years  11–20 years  >20 years |
| During the past 5 years I have completed further education in dental radiology | 🞏  🞏 | Yes  No |
| I work as s general dental practitioner | 🞏  🞏 | Yes  No |
| I work as a specialist | 🞏  🞏 | Yes  No |
| Specialist in… |  | ……………. |
| I work in… | 🞏  🞏 | Public dental health service  Private practice |
| Number of treatment rooms in my clinic | 🞏  🞏  🞏 | 1–2 rooms  3–6 rooms  >6 rooms |
| At the clinic, there is | 🞏  🞏  🞏 | Panoramic equipment  No panoramic equipment, refer to colleague or specialist radiologist  No panorama equipment, never refer for panorama survey |
| In the case of a panoramic survey we use... | 🞏  🞏  🞏  🞏 | X-ray film  Image plates  Direct digital sensor  Do not know |
| Estimate how many panoramic images are exposed in the clinic per month... | 🞏  🞏  🞏  🞏 | 1–10  11–20  21–30  >30 |
| Who mostly performs the exposure of the panoramic images? | 🞏  🞏  🞏 | Dentist  Nurse / dental hygienist  Auxiliary |
| At the clinic, there is… | 🞏 | CBCT equipment |
| 🞏 | No CBCT equipment; refer to colleague or specialist radiologist |
| 🞏 | No CBCT equipment; never refer for CBCT survey |
| If there is CBCT equipment at the clinic, who performs most CBCT exposures? | 🞏  🞏  🞏 | Dentist  Nurse / dental hygienist  Auxiliary |
| Can you estimate how many CBCT surveys are done at the clinic per year? | 🞏  🞏  🞏  🞏  🞏 | 0–25  26–50  51–75  >75  Not applicable |
